# Supplementary material for: Mixtures of pH-responsive microgels and temperature-responsive star-like copolymers; from heteroaggregation to gelation
Source: Royal Society of Chemistry journal article supplement (doi:10.1039/c3sm27836k), 2013-01-01
Supplement: c3sm27836k.pdf [file c3sm27836k.pdf]

## SUPPLEMENTARY INFORMATION

### Mixtures of pH-responsive microgels and temperature-responsive star-like copolymers; from heteroaggregation to gelation

Somjit Tungchaiwattana<sup>a</sup>, Ruixue Liu<sup>a,b</sup>, Silvia Halacheva<sup>a</sup> Nur Nabilah Shahidan<sup>a</sup>,  
Andrew Kells<sup>c</sup> and Brian R. Saunders<sup>a,\*</sup>

<sup>a</sup>*Polymer Science and Engineering Research Group, School of Materials,*

*The University of Manchester, Grosvenor Street, Manchester, M13 9PL, U.K.*

<sup>b</sup> *School of Material and Chemical Engineering, Zhengzhou University of Light Industry,*  
*Zhengzhou, 450002, P.R. China*

<sup>c</sup>*Synthomer Ltd, 1½ miles Jalan Batu Pahat, 86000 Kluang, Johor, Malaysia*

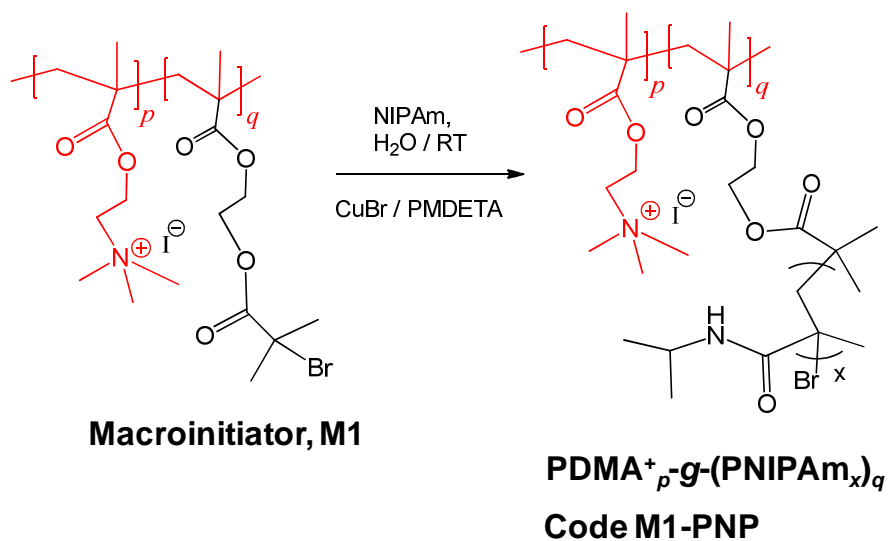

**Scheme S1.** Preparation of temperature-responsive star-like PNP copolymers.

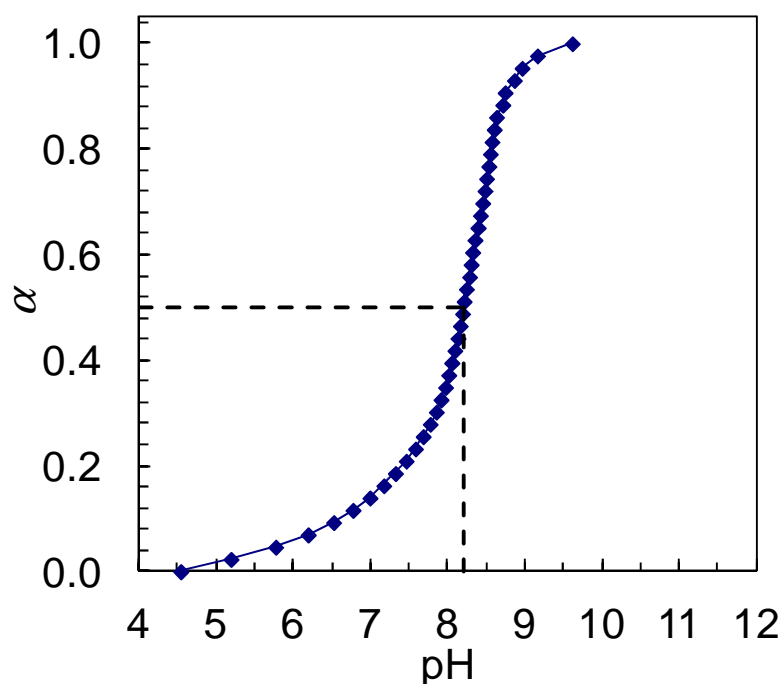

**Fig. S1.** Potentiometric titration data for the MG.  $\alpha$  is the degree of neutralisation. The dashed line corresponds to the apparent  $pK_a$ .

### M1-PNP copolymer compositions from $^1\text{H}$ NMR spectroscopy

The M1-PNP60 and M1-PNP100 copolymers were analysed using  $^1\text{H}$  NMR spectroscopy. The spectra for both copolymers were similar and are shown in Fig. S2(a). For comparison, a spectrum of PNP is shown in Fig. S2(b). The  $^1\text{H}$  NMR spectrum for the macroinitiator (M1) is shown for comparison in Fig. S2(c). The assignments for the NP protons (Fig. S2(a) and (b)) and the  $-\text{N}(\text{CH}_3)_3^+$  protons are from Ray et al. [1] and Liu et al. [2], respectively. The spectra for M1-PNP60 and M1-PNP100 are dominated by PNP as can be seen from comparison to Fig. S2(b). This confirms that the side-chain degrees of polymerisation ( $x$ ) were long compared to the backbone for both M1-PNP60 and M1-PNP100. Fig. S2(a) shows expansions of the  $-\text{N}(\text{CH}_3)_3^+$  protons (labelled as  $f$ ). The ratio of carefully integrated areas for these protons ( $A_f$ ) to those for the  $-(\text{CH}_3)_2\text{CH}-$  protons (labelled as  $d$ ) gave the value for  $x$ , using  $x = 9(A_d/A_f)$ . The analysis gave  $x$  values of 550 and 875 for M1-PNP60 and M1-PNP100, respectively.

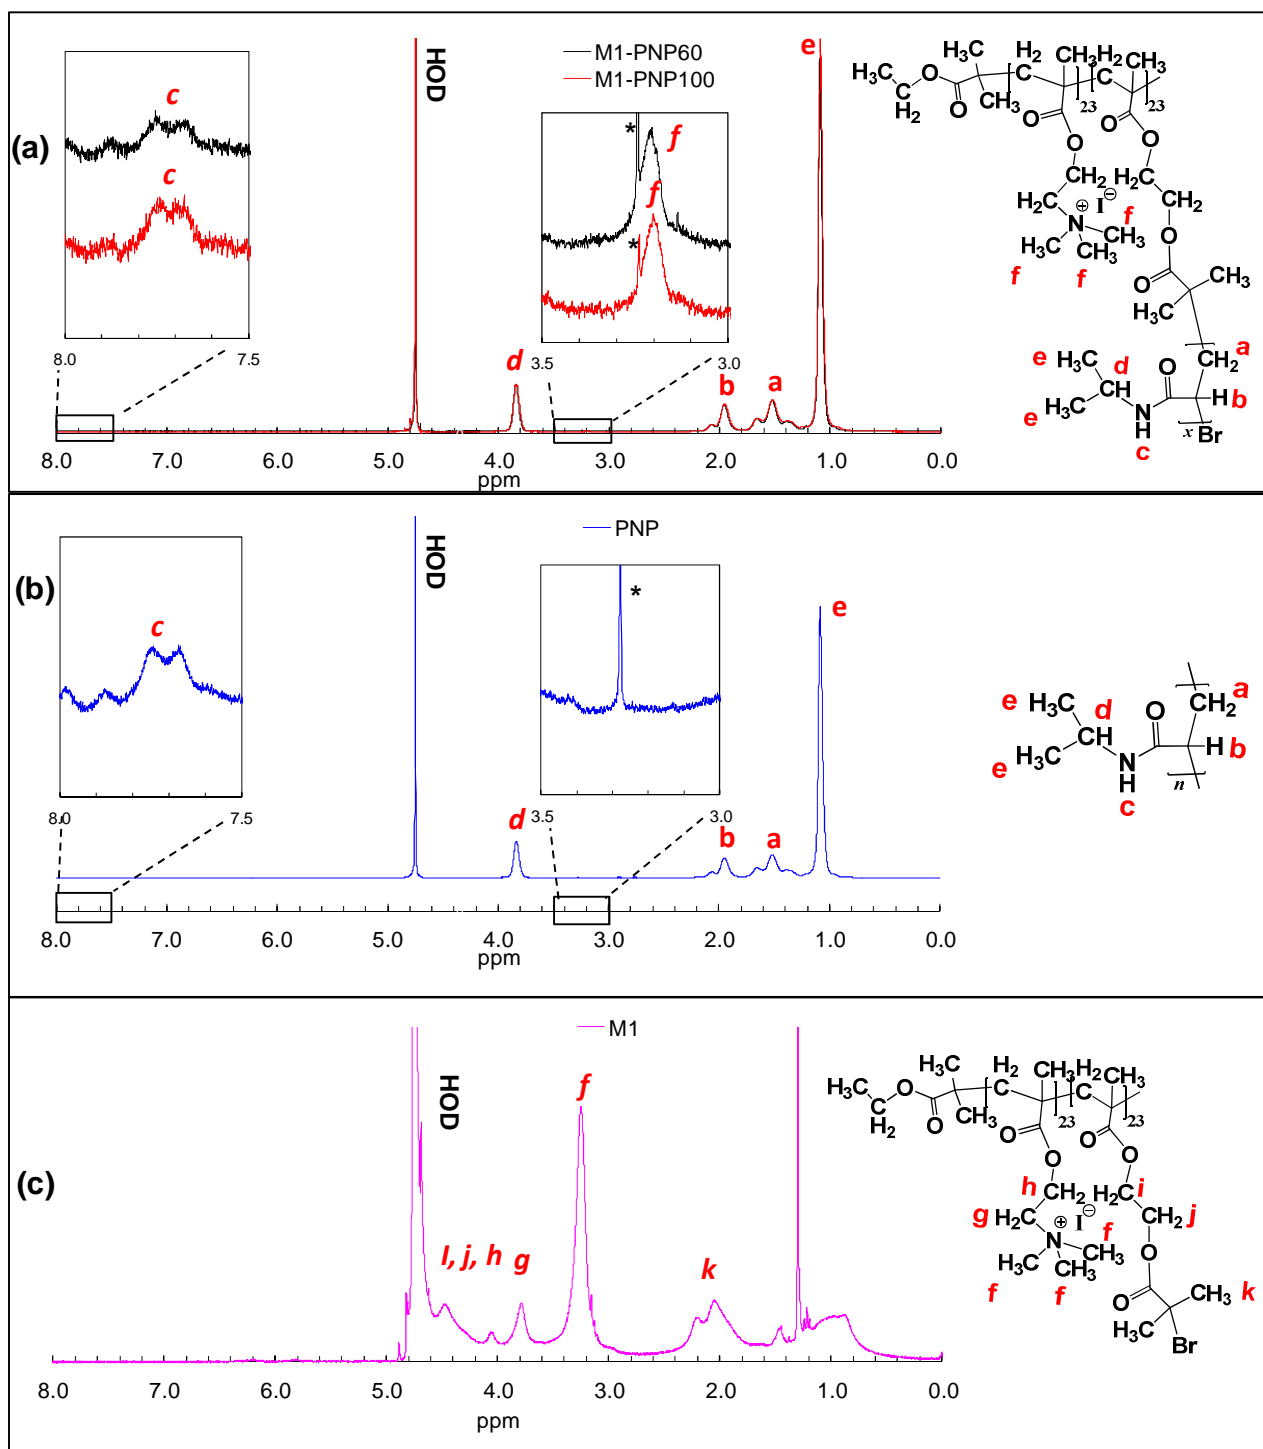

**Fig. S2**  $^1\text{H}$  NMR spectra of (a) M1-PNP60 and M1-PNP100 copolymers, (b) PNP and (c) M1. The spectra were recorded at room temperature in  $\text{D}_2\text{O}$ . The asterisks identify an impurity peak. The spectra in (a) have been offset vertically to make the magnified regions (insets) clearer.

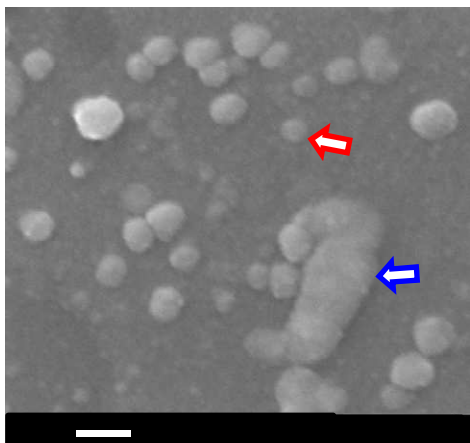

**Fig. S3** SEM image for deposited M1-PNP60. The red arrow shows a nanoparticle. The blue arrows identify a large nanoparticle aggregate. The scale bar is 200 nm.

### References

- [1] B. Ray, Y. Isobe, K. Matsumoto, S. Habaue, Y. Okamoto, M. Kamigaito, M. Sawamoto, *Macromolecules*, 2004, **37**, 1702.
- [2] R. Liu, P. De Leonardis, F. Cellesi, N. Tirelli and B. R. Saunders, *Langmuir*, 2008, **24**, 7099.
